# Supplementary material for: Glycosyltransferase ST6Gal-I promotes the epithelial to mesenchymal transition in pancreatic cancer cells
Source: PubMed Central journal article supplement (PMC7949065; doi:10.1074/jbc.ra120.014126), 2020-11-23
Supplement: mmc1.pdf [file mmc1.pdf]

## **Supplementary Results**

RNA-Seq was conducted to compare gene expression in parental Suit2 cells with two isogenic, metastatic Suit2 subclones, S2-013 and S2-LM7AA. In addition, ST6Gal-I was overexpressed (OE) in Suit2 parental cells, and gene expression in OE cells compared with control, empty vector (EV)-transduced Suit2 cells. Data from these experiments are included in the following Supplementary Tables:

### **Supplementary Table 1. Genes altered in S2-013 and S2-LM7AA cells relative to Suit2 EV cells.**

This table lists the top 50 upregulated and downregulated genes in the two metastatic subclones compared to parental, poorly-metastatic Suit2 cells.

### **Supplementary Table 2. IPA Upstream Regulators altered in S2-013 and S2-LM7AA cells relative to Suit2 EV cells.**

In this table, the Ingenuity Pathway Analysis (IPA) Upstream Regulators module was used to identify the pathways either activated or inhibited in the two metastatic subclones as compared with parental Suit2 cells.

### **Supplementary Table 3. Genes altered in Suit2 OE versus Suit2 EV cells**

This table lists the top 50 upregulated and downregulated genes in Suit2 OE cells as compared to Suit2 EV cells.

### **Supplementary Table 4. IPA Upstream Regulators altered in Suit2 OE relative to Suit2 EV cells.**

In this table, the IPA Upstream Regulators module was used to identify the pathways either activated or inhibited in Suit2 OE cells as compared to Suit2 EV cells.

**Supplementary Table 1.** Genes altered in S2-013 and S2-LM7AA relative to Suit2 EV cells

**A** Top 50 upregulated genes

| S2-013    |           | S2-LM7AA  |           |
|-----------|-----------|-----------|-----------|
| gene name | Z Score   | gene name | Z Score   |
| CHST9     | 4.9791565 | CHRM3     | 4.848015  |
| BOC       | 4.967989  | EPHA7     | 4.834556  |
| TRABD2B   | 4.9650354 | SETBP1    | 4.8167334 |
| CRMP1     | 4.9584484 | GJA1      | 4.7665424 |
| SPOCK1    | 4.953624  | LDLRAD4   | 4.741674  |
| ERBB4     | 4.953421  | P2RY1     | 4.71017   |
| SLC17A3   | 4.9468355 | WFDC1     | 4.6820936 |
| RGS4      | 4.9465475 | AUTS2     | 4.635952  |
| EVC       | 4.943861  | PLAT      | 4.589742  |
| EPHA7     | 4.9315243 | KCNJ15    | 4.5756273 |
| PTGER2    | 4.9291673 | CALD1     | 4.5452437 |
| ISM1      | 4.918633  | LRIG1     | 4.5425453 |
| PCYT1B    | 4.9124303 | GRID1     | 4.493754  |
| ENOX1     | 4.9119964 | KCNJ12    | 4.4503117 |
| DNAJC5B   | 4.906601  | KCNJ4     | 4.3913965 |
| TNFAIP6   | 4.899787  | CAMK4     | 4.3471484 |
| LNCAROD   | 4.8977523 | HLX       | 4.339615  |
| KCNJ15    | 4.890724  | FEZ1      | 4.3220263 |
| WFDC1     | 4.8895035 | BVES      | 4.2801723 |
| CRYAB     | 4.880079  | NTF3      | 4.2795386 |
| EPHB1     | 4.8786187 | TMEFF2    | 4.273749  |
| HES7      | 4.873289  | DSCAML1   | 4.2371936 |
| SEMA6A    | 4.8631697 | PDGFD     | 4.2251496 |
| VAV3      | 4.8450937 | VCAM1     | 4.2105227 |
| NTNG2     | 4.834516  | ADGRA2    | 4.192516  |
| AFF3      | 4.8277216 | ASB9      | 4.1669703 |
| FAM155A   | 4.826208  | NACAD     | 4.1570516 |
| SEMA6B    | 4.81453   | CD226     | 4.144238  |
| MIOX      | 4.8108425 | LPAR3     | 4.1395035 |
| CALD1     | 4.8006387 | ISM1      | 4.121965  |
| PRDM16    | 4.800318  | HLA-DPB1  | 4.108773  |
| GPC4      | 4.7849913 | LYPD6     | 4.085726  |
| SMIM32    | 4.7691774 | CNIH3     | 4.0844517 |
| PLCB4     | 4.7635036 | TIMP3     | 4.063056  |
| HLF       | 4.752887  | LZTS1     | 4.0617776 |
| ALPK2     | 4.743556  | SGK1      | 4.0599556 |
| TSPAN7    | 4.7234907 | ANGPTL2   | 4.0381    |
| INHBB     | 4.715522  | RNVU1-4   | 4.029565  |
| PRR16     | 4.70858   | P3H3      | 4.0244584 |
| STK32B    | 4.703925  | SRPX      | 4.009984  |
| DCDC2     | 4.7028785 | TSHZ3     | 4.007069  |
| HRK       | 4.701378  | TRIM22    | 3.9996552 |
| DPF3      | 4.6949487 | OSBPL6    | 3.9904444 |
| SLC16A7   | 4.6945863 | NLGN1     | 3.987834  |
| MITF      | 4.694077  | CLDN16    | 3.9798505 |
| FXD2      | 4.6820965 | PAK3      | 3.9570365 |
| SLC6A15   | 4.679244  | NKAIN     | 3.9442637 |
| AQP1      | 4.6703873 | SUSD5     | 3.9180527 |
| ADGRA2    | 4.663525  | FLT1      | 3.9056764 |
| OTOP1     | 4.663312  | AK5       | 3.898411  |

**B** Top 50 downregulated genes

| S2-013    |            | S2-LM7AA  |            |
|-----------|------------|-----------|------------|
| gene name | Z Score    | gene name | Z Score    |
| C4BPB     | -4.9913206 | GALNT3    | -4.851432  |
| CDH2      | -4.9894357 | CEACAM6   | -4.8127456 |
| TMEM176A  | -4.989257  | PHACTR3   | -4.7663064 |
| CCDC152   | -4.981356  | MAL2      | -4.7495804 |
| UGT1A8    | -4.978773  | SCEL      | -4.73677   |
| ADH1C     | -4.978284  | BSPRY     | -4.709945  |
| TBX2      | -4.9756083 | MYO1D     | -4.6571813 |
| TMEM176B  | -4.97384   | FGF19     | -4.6166573 |
| CYP2C18   | -4.9592485 | STX19     | -4.616506  |
| TSPAN8    | -4.954827  | DAPP1     | -4.588257  |
| HSD17B2   | -4.9410048 | EPHB6     | -4.573664  |
| TM4SF20   | -4.928785  | PAG1      | -4.521394  |
| NRIP3     | -4.9246254 | RAB25     | -4.390008  |
| CLRN3     | -4.919323  | ZNF334    | -4.375597  |
| SERPINB5  | -4.906589  | SPNS2     | -4.3255653 |
| SERPINE2  | -4.9061775 | TMEM30B   | -4.3226357 |
| GASK1B    | -4.883624  | WNT10A    | -4.288116  |
| MUC13     | -4.8676414 | FAM131B   | -4.2616997 |
| HHLA2     | -4.8645015 | ESRP1     | -4.205865  |
| CLCN1     | -4.8588605 | BHLHE41   | -4.1997476 |
| AGR2      | -4.8586965 | GPX2      | -4.1956625 |
| GPA33     | -4.8570194 | FOXJ1     | -4.177557  |
| ZNF334    | -4.838888  | EPN3      | -4.1530743 |
| RASGEF1B  | -4.824592  | KDF1      | -4.1398654 |
| AKR1C2    | -4.8205986 | CBLC      | -4.133392  |
| IKZF2     | -4.7992053 | ITGB6     | -4.1187105 |
| UGT1A10   | -4.7964425 | AKR1B10   | -4.114817  |
| PKIA      | -4.778929  | MARVELD3  | -4.099542  |
| CEACAM6   | -4.7645407 | MPP7      | -4.073924  |
| KCNJ3     | -4.740252  | CDH1      | -4.070056  |
| KIAA0040  | -4.7266226 | FAM83F    | -4.068028  |
| STEAP1    | -4.7240286 | FAM83A    | -4.055757  |
| FGF19     | -4.692759  | TRBC2     | -3.991412  |
| RASSF9    | -4.660843  | TMPRSS13  | -3.9877846 |
| ANPEP     | -4.647873  | CYP2C18   | -3.9834173 |
| SNAI2     | -4.641878  | RBBP8NL   | -3.9809165 |
| HAS2      | -4.6326146 | ANO1      | -3.9807398 |
| SPINK7    | -4.624757  | FUT2      | -3.9651875 |
| VSTM2L    | -4.622706  | KCNJ3     | -3.949789  |
| MOB3B     | -4.6150417 | MPZL2     | -3.947292  |
| XYLT1     | -4.6099906 | MACC1     | -3.942559  |
| CGREF1    | -4.601841  | ENPP5     | -3.9124942 |
| ADH6      | -4.597636  | ANKRD22   | -3.8937342 |
| CYP4F3    | -4.5905004 | CYP2C9    | -3.887514  |
| SLC38A11  | -4.58188   | NCMAP     | -3.8839972 |
| B3GALT1   | -4.563985  | SPRR1B    | -3.8657577 |
| MXRA5     | -4.5547056 | OVOL1     | -3.855813  |
| PLA2R1    | -4.552125  | P2RY2     | -3.8537807 |
| OMP       | -4.5512743 | RAB11FIP4 | -3.8528874 |
| CXCL1     | -4.5478554 | TSPAN2    | -3.8372097 |

**Supplementary Table 2.** IPA Upstream Regulators altered in S2-013 and S2-LM7AA relative to Suit2 EV cells

**A** Upstream Regulators with predicted activation

| S2-013         |         | S2-LM7AA            |         |
|----------------|---------|---------------------|---------|
| Regulator      | Z Score | Regulator           | Z Score |
| DSCAM          | 4.122   | TGFB1               | 4.557   |
| TEAD4          | 4.086   | MRTFB               | 4.182   |
| TEAD1          | 3.979   | Tgf beta            | 4.016   |
| NRG1           | 3.729   | NRG1                | 3.789   |
| CCR2           | 3.687   | MRTFA               | 3.491   |
| SIM1           | 3.637   | F2                  | 3.441   |
| TEAD3          | 3.578   | WNT3A               | 3.388   |
| ARNT2          | 3.569   | EDN1                | 3.378   |
| NSUN6          | 3.5     | LLGL2               | 3.317   |
| MRTFB          | 3.466   | CCR2                | 3.111   |
| DSCAML1        | 3.452   | SMARCA4             | 3.071   |
| Tgf beta       | 3.452   | CTNNB1              | 3.043   |
| CBX5           | 3.317   | SHH                 | 2.95    |
| TEAD2          | 3.3     | BDNF                | 2.914   |
| TGFB1          | 3.141   | NSUN6               | 2.887   |
| MAPK1          | 3.046   | EPAS1               | 2.881   |
| BDNF           | 2.943   | D-glucose           | 2.861   |
| LLGL2          | 2.887   | MAPK1               | 2.852   |
| glucocorticoid | 2.863   | FGF8                | 2.815   |
| NOTCH1         | 2.842   | ROR1                | 2.813   |
| SMAD3          | 2.796   | SMAD1               | 2.805   |
| DLX5           | 2.789   | SMAD3               | 2.791   |
| Wnt            | 2.739   | AGER                | 2.787   |
| Tcf7           | 2.709   | GLI1                | 2.787   |
| WWTR1          | 2.697   | NORAD               | 2.714   |
| HIF1A          | 2.695   | TWIST1              | 2.709   |
| BMP6           | 2.664   | DSCAM               | 2.683   |
| TFAP2A         | 2.59    | ROCK1               | 2.621   |
| D-glucose      | 2.569   | ATF2                | 2.615   |
| LATS2          | 2.534   | IPMK                | 2.611   |
| CTNNB1         | 2.493   | Interferon $\alpha$ | 2.576   |
| KMT2D          | 2.468   | RUNX1               | 2.563   |
| FBXO32         | 2.467   | IgG                 | 2.542   |
| TAZ            | 2.467   | TEAD2               | 2.53    |
| F2             | 2.45    | cyclic AMP          | 2.528   |
| EDNRA          | 2.449   | ETS1                | 2.523   |
| ARRB1          | 2.433   | NOTCH3              | 2.513   |
| GLI1           | 2.433   | F3                  | 2.466   |
| WBP2           | 2.419   | MTPN                | 2.459   |
| NFIC           | 2.414   | SP1                 | 2.435   |
| VDR            | 2.385   | CBX5                | 2.414   |
| STK40          | 2.384   | GDF9                | 2.392   |
| NCOA4          | 2.383   | FEV                 | 2.357   |
| PLAG1          | 2.377   | IL6                 | 2.34    |
| TP53           | 2.35    | ARNT2               | 2.335   |
| SNAI2          | 2.343   | CYP1B1              | 2.333   |
| STAT5B         | 2.336   | RETNLB              | 2.331   |
| MET            | 2.325   | LEF1                | 2.314   |
| JAG1           | 2.315   | progesterone        | 2.311   |
| BRD4           | 2.273   | TEAD1               | 2.309   |
| CIITA          | 2.27    | CG                  | 2.268   |
| WNT1           | 2.245   | MAPK14              | 2.268   |
| Growth hormone | 2.226   | IFNAR1              | 2.249   |
| DLX6           | 2.219   | KDM3A               | 2.241   |
| TEK            | 2.219   | HRG                 | 2.236   |
| MMP7           | 2.213   | JAG1                | 2.223   |
| KDM3A          | 2.197   | IFNA2               | 2.212   |
| NMNAT1         | 2.197   | WBP2                | 2.212   |
| IL1R2          | 2.186   | EGF                 | 2.207   |
| ROCK1          | 2.178   | GAB2                | 2.201   |
| PPP1CA         | 2.176   | Fgf                 | 2.2     |
| TET3           | 2.176   | PDGFC               | 2.198   |
| APLN           | 2.164   | Tnf receptor        | 2.19    |
| TRIM59         | 2.157   | TGFBR1              | 2.181   |
| HRG            | 2.138   | BRD4                | 2.178   |
| NORAD          | 2.138   | Secretase gamma     | 2.177   |
| IL10           | 2.115   | MYOD1               | 2.166   |
| GLI2           | 2.103   | RAF1                | 2.163   |
| CSF1           | 2.089   | RAC1                | 2.152   |
| ERBB3          | 2.084   | TEAD4               | 2.137   |
| LEF1           | 2.083   | VCAN                | 2.126   |
| ROR1           | 2.074   | CLEC4G              | 2.121   |
| JAK1/2         | 2.065   | CYP1A2              | 2.121   |
| EBI3           | 2.06    | TEAD3               | 2.111   |
| FOXC2          | 2.048   | PTK2                | 2.103   |
| EGR2           | 2.025   | Ap1                 | 2.086   |
| II3            | 2.025   | ZEB1                | 2.06    |
| EREG           | 2.012   | WWTR1               | 2.041   |
| HCAR1          | 2       | SIM1                | 2.038   |
| SMC3           | 2       | TCF7L2              | 2.01    |
|                |         | $\beta$ catenin/TCF | 2       |
|                |         | Endothelin          | 2       |
|                |         | RXFP2               | 2       |

**B** Upstream Regulators with predicted inhibition

| S2-013               |         | S2-LM7AA             |         |
|----------------------|---------|----------------------|---------|
| Regulator            | Z Score | Regulator            | Z Score |
| RUNX3                | -3.665  | RUNX3                | -3.969  |
| EGLN                 | -3.344  | SPDEF                | -3.771  |
| PTPN1                | -3.293  | PKD1                 | -3.573  |
| FAS                  | -3.132  | Alpha catenin        | -3.386  |
| HRAS                 | -3.016  | estrogen receptor    | -3.375  |
| NR1H4                | -2.999  | FGF1                 | -3.347  |
| OGA                  | -2.898  | FAS                  | -3.231  |
| IKZF3                | -2.605  | CR1L                 | -3.121  |
| SFTPA1               | -2.578  | ALDH1A2              | -2.985  |
| GFI1                 | -2.505  | SMAD7                | -2.75   |
| CXCR3                | -2.425  | GFI1                 | -2.693  |
| IL17R                | -2.414  | DICER1               | -2.649  |
| TNFSF12              | -2.393  | GAPDH                | -2.621  |
| TRADD                | -2.345  | FBN1                 | -2.607  |
| FOSL1                | -2.286  | REST                 | -2.414  |
| NCOR1                | -2.236  | HNF1A                | -2.391  |
| PTPRE                | -2.236  | SOCS1                | -2.311  |
| SAV1                 | -2.236  | CIP2A                | -2.309  |
| SPDEF                | -2.226  | KRAS                 | -2.3    |
| SFRP1                | -2.214  | ABCB4                | -2.294  |
| RORC                 | -2.213  | Atrial Natri.Peptide | -2.236  |
| KMT5B                | -2.2    | SPINT1               | -2.224  |
| LTF                  | -2.2    | NOSTRIN              | -2.208  |
| NFKBIZ               | -2.193  | MED16                | -2.205  |
| RIPK2                | -2.134  | TNFRSF1A             | -2.191  |
| IL36A                | -2.072  | HNF1B                | -2.176  |
| DL-fructose          | -2.046  | DKK1                 | -2.172  |
| FGF1                 | -2.039  | FOXA3                | -2.122  |
| DICER1               | -2.027  | GPX1                 | -2.07   |
| CLOCK                | -2.024  | TAF4                 | -2.007  |
| GATA6                | -2.006  | CHD1                 | -2      |
| Atrial Natri.Peptide | -2      | GLIS2                | -2      |
| CISH                 | -2      | SFRP4                | -2      |
| FAF1                 | -2      |                      |         |
| LGALS8               | -2      |                      |         |
| MEDAG                | -2      |                      |         |

**Supplementary Table 3.** Genes altered in Suit2 OE versus Suit2 EV cells

**A** Top 50 upregulated genes

| Suit2 OE vs. Suit EV |           |
|----------------------|-----------|
| gene name            | Z Score   |
| BASP1                | 4.9322567 |
| STK32B               | 4.8835506 |
| EPHB1                | 4.7745857 |
| ST6GAL1              | 4.7094207 |
| KCNMA1               | 4.5498943 |
| KCNJ15               | 4.4093223 |
| PDGFD                | 4.2174225 |
| CALD1                | 4.172452  |
| WFDC1                | 3.9941797 |
| P2RY1                | 3.9835193 |
| ANXA8L1              | 3.9461062 |
| SLC16A7              | 3.8598228 |
| DPF3                 | 3.8140402 |
| ALPK2                | 3.775378  |
| ILDR2                | 3.7584732 |
| SEMA6B               | 3.7221954 |
| SNCG                 | 3.6903024 |
| PGBD5                | 3.6679268 |
| DPYSL5               | 3.6629093 |
| FXD2                 | 3.6378546 |
| WNT5A                | 3.6239634 |
| IGFBP2               | 3.5305097 |
| NEURL1               | 3.486795  |
| AQP1                 | 3.480325  |
| SPOCK1               | 3.467746  |
| BTNL8                | 3.4442382 |
| FRMD3                | 3.4297755 |
| DRAXIN               | 3.4053168 |
| NUGGC                | 3.4053168 |
| SLC6A15              | 3.3929842 |
| TARID                | 3.3746426 |
| AFF3                 | 3.352433  |
| RGS4                 | 3.3237362 |
| CCDC80               | 3.2820559 |
| SPP1                 | 3.2807908 |
| SFTPD                | 3.2591472 |
| CAMK4                | 3.2503872 |
| HES7                 | 3.2448862 |
| SRPX                 | 3.2286468 |
| NLGN1                | 3.199847  |
| LPAR3                | 3.1771877 |
| TRIM9                | 3.162713  |
| LOXL2                | 3.152729  |
| LRIG1                | 3.1396716 |
| SMIM32               | 3.138023  |
| DCLK2                | 3.1370163 |
| ANTXR1               | 3.127695  |
| TNC                  | 3.1158962 |
| MITF                 | 3.0908923 |
| AUTS2                | 3.0765173 |

**B** Top 50 downregulated genes

| Suit2 OE vs. Suit2 EV |            |
|-----------------------|------------|
| gene name             | Z Score    |
| GASK1B                | -3.3527489 |
| TCIM                  | -2.9040418 |
| FCER1G                | -2.8452768 |
| ANGPTL7               | -2.7785919 |
| HHLA2                 | -2.7483401 |
| ANXA10                | -2.3554127 |
| PRR35                 | -2.348888  |
| CCDC175               | -2.2943113 |
| CYP2C18               | -2.2828605 |
| DHRS9                 | -2.250698  |
| CIDEC                 | -2.1772063 |
| SLC16A9               | -2.1759825 |
| AKR1B10               | -2.0901911 |
| SIDT1                 | -2.0725164 |
| MMP1                  | -2.0614552 |
| ZC3H11A               | -2.0372212 |
| FOXF1                 | -2.028866  |
| BAMBI                 | -2.0213413 |
| AKR1B15               | -2.0111032 |
| WNT7A                 | -2.007517  |
| SULT1C2               | -1.9560361 |
| CLCN1                 | -1.9129947 |
| GUCY1A1               | -1.9120764 |
| RGS2                  | -1.9100358 |
| SNORA59B              | -1.9020985 |
| PKIA                  | -1.8948313 |
| ERFL                  | -1.8901143 |
| KRT17                 | -1.8871663 |
| CYP2C9                | -1.8866144 |
| SLC9A2                | -1.8684675 |
| DPP4                  | -1.8655809 |
| XK                    | -1.8138207 |
| CEACAM6               | -1.8080875 |
| LRRN4CL               | -1.797032  |
| SNORA71B              | -1.7757243 |
| LNCAROD               | -1.7651157 |
| ABCC2                 | -1.750571  |
| P2RY2                 | -1.749371  |
| CES4A                 | -1.7472205 |
| SPRR1B                | -1.7442523 |
| AGMAT                 | -1.6901253 |
| IL1RL1                | -1.6725954 |
| H3C8                  | -1.6652617 |
| S100P                 | -1.6648424 |
| EVA1A                 | -1.648896  |
| TFF1                  | -1.6450198 |
| DDX4                  | -1.6357026 |
| RAET1L                | -1.6357026 |
| CELA2B                | -1.6357026 |
| KYNU                  | -1.6319162 |

**Supplementary Table 4.** IPA Upstream Regulators altered in Suit2 OE relative to Suit2 EV cells

**A** Upstream Regulators with predicted activation

| Suit2 OE vs. EV   |         | Suit2 OE vs. EV (continued) |         |
|-------------------|---------|-----------------------------|---------|
| Regulator         | Z Score | Regulator                   | Z Score |
| ARNT2             | 4       | NFAT5                       | 2.592   |
| TGFB1             | 3.943   | SRC (family)                | 2.588   |
| HIF1A             | 3.905   | BDNF                        | 2.58    |
| NRG1              | 3.696   | Growth hormone              | 2.469   |
| TP53              | 3.68    | ZAP70                       | 2.449   |
| SMARCA4           | 3.669   | CD247                       | 2.449   |
| SIM1              | 3.615   | TEAD4                       | 2.449   |
| STAT3             | 3.546   | KDM3A                       | 2.433   |
| Tgf beta          | 3.543   | JUN                         | 2.433   |
| NFKBIA            | 3.537   | ROCK1                       | 2.425   |
| WNT3A             | 3.535   | cholesterol                 | 2.395   |
| KLF4              | 3.358   | BMP2                        | 2.381   |
| SP1               | 3.327   | IL27                        | 2.359   |
| EHMT1             | 3.317   | KITLG                       | 2.343   |
| DSCAML1           | 3.3     | glucocorticoid              | 2.332   |
| SMAD3             | 3.296   | SOX4                        | 2.331   |
| F2R               | 3.265   | SOX11                       | 2.306   |
| AGT               | 3.131   | CCN2                        | 2.297   |
| VitaminD3-VDR-RXR | 3.127   | CG                          | 2.287   |
| cyclic AMP        | 3.105   | SMAD4                       | 2.264   |
| JAG1              | 3.086   | AR                          | 2.237   |
| SMARCB1           | 3.053   | IFNAR1                      | 2.236   |
| WBP2              | 3.036   | TIMP1                       | 2.236   |
| LEF1              | 3.026   | ROR1                        | 2.236   |
| MTPN              | 2.97    | THRB                        | 2.234   |
| aldosterone       | 2.962   | ERG                         | 2.228   |
| TGFBR1            | 2.942   | OTX2                        | 2.216   |
| RAF1              | 2.936   | FGF10                       | 2.213   |
| VEGFA             | 2.935   | Complement                  | 2.213   |
| MRTFB             | 2.883   | GLI1                        | 2.208   |
| FEV               | 2.828   | ARID1A                      | 2.2     |
| RETNLB            | 2.828   | TAF7L                       | 2.2     |
| MAFB              | 2.789   | RARB                        | 2.197   |
| F2                | 2.787   | CEBPB                       | 2.193   |
| PDGFB             | 2.777   | FOXC2                       | 2.169   |
| APLN              | 2.728   | Brd4                        | 2.138   |
| GDF2              | 2.718   | F3                          | 2.135   |
| TGM2              | 2.692   | D-glucose                   | 2.118   |
| SHH               | 2.689   | TP73                        | 2.096   |
| DSCAM             | 2.688   | MRTFA                       | 2.078   |
| NFkB (complex)    | 2.671   | IL13                        | 2.068   |
| SGK1              | 2.646   | STAT1                       | 2.038   |
| NORAD             | 2.646   | SMAD1                       | 2.038   |
| NSUN6             | 2.646   | CNR1                        | 2.027   |
| LLGL2             | 2.646   | P38 MAPK                    | 2.023   |
| EPAS1             | 2.64    | HOXB13                      | 2       |
| T3-TR-RXR         | 2.63    | FHL2                        | 2       |
| BRD4              | 2.626   | vitamin K2                  | 2       |
| CCL5              | 2.596   | HRG                         | 2       |

**B** Upstream Regulators with predicted inhibition

| Suit2 OE vs. EV |         |
|-----------------|---------|
| Regulator       | Z Score |
| Alpha catenin   | -3.894  |
| EGLN            | -3.773  |
| ZNF217          | -3.162  |
| CBX5            | -2.887  |
| IKZF3           | -2.828  |
| FFAR3           | -2.813  |
| PSMB11          | -2.714  |
| SYK             | -2.63   |
| FAS             | -2.614  |
| SOX1            | -2.53   |
| SPDEF           | -2.53   |
| DNMT3B          | -2.5    |
| EED             | -2.449  |
| CR1L            | -2.412  |
| DKK1            | -2.393  |
| KDM1A           | -2.341  |
| KDM3B           | -2.236  |
| NPC2            | -2.236  |
| GMNN            | -2.145  |
| COL18A1         | -2.143  |
| REST            | -2.135  |
| CDKN1B          | -2.132  |
| CIP2A           | -2.121  |
| SOX3            | -2.111  |
| KRAS            | -2.081  |
| LRP1            | -2      |
| LATS1           | -2      |
